# Supplementary material
Source: PubMed Central journal article supplement (PMC5892732)
Supplement: fj.201701067R.sf4.pdf [file fj.201701067R.sf4.pdf]

**A**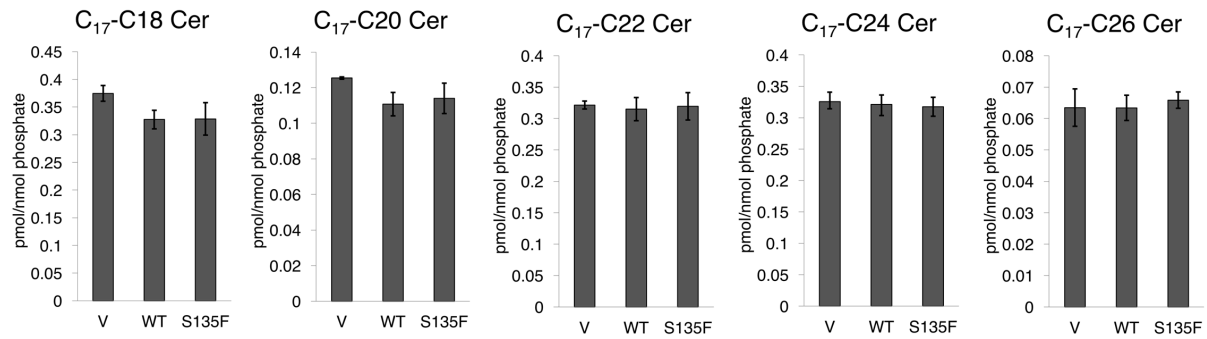**B**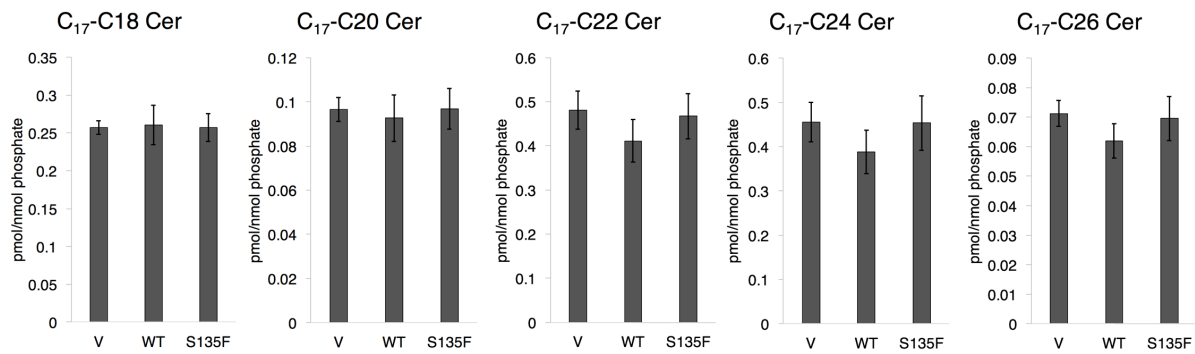

**Figure S4. Ceramide synthase activity is not transiently altered via C<sub>17</sub>-sphingosine labeling assay.** (A) Transient transfection of vector, WT Hsp27, and S135F Hsp27 does not alter ceramide synthase activity (n=3). (B) Stable transfections vector, WT Hsp27, and S135F Hsp27 does not alter ceramide synthase activity in S135F compared to WT (n=7).
