# Supplementary material
Source: PubMed Central journal article supplement (PMC5892732)
Supplement: fj.201701067R.sf5.pdf [file fj.201701067R.sf5.pdf]

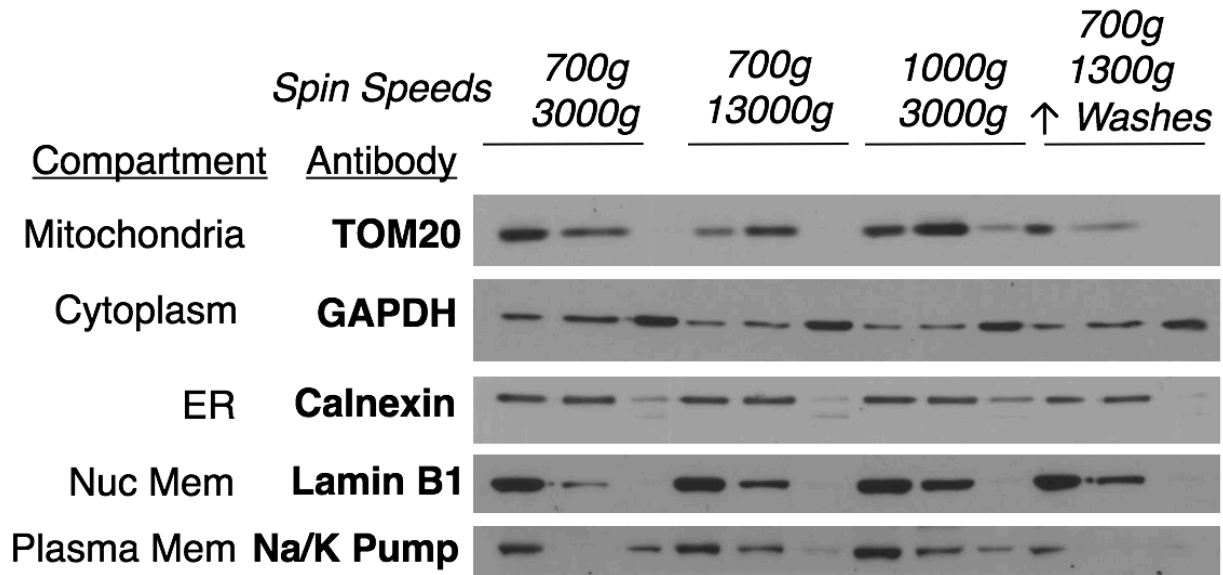

**Figure S5. Subcellular Fractionation Optimization for Mitochondria.** Crude mitochondrial purification preparations analyzed by Western blot to evaluate purification quality. Preparations were performed with subsequent 1000g and 3000g spins to increase purity.
