# Supplementary material
Source: PubMed Central journal article supplement (PMC5892732)
Supplement: fj.201701067R.sf6.pdf [file fj.201701067R.sf6.pdf]

A

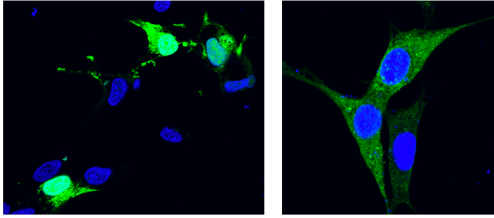

B

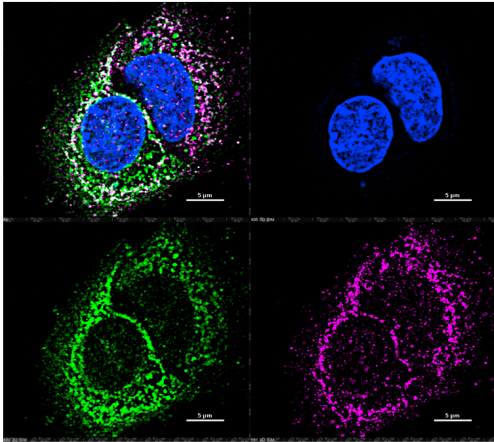

**Figure S6. Successful transfection of HT-22 cells and dorsal root ganglia.** (A) Representative images of HT-22 transfection with eGFP. (B) Representative image of DRG transfection with eGFP (green) with TrpV1 (purple).
