# Supplementary material
Source: PubMed Central journal article supplement (PMC5892732)
Supplement: fj.201701067R.sf8.pdf [file fj.201701067R.sf8.pdf]

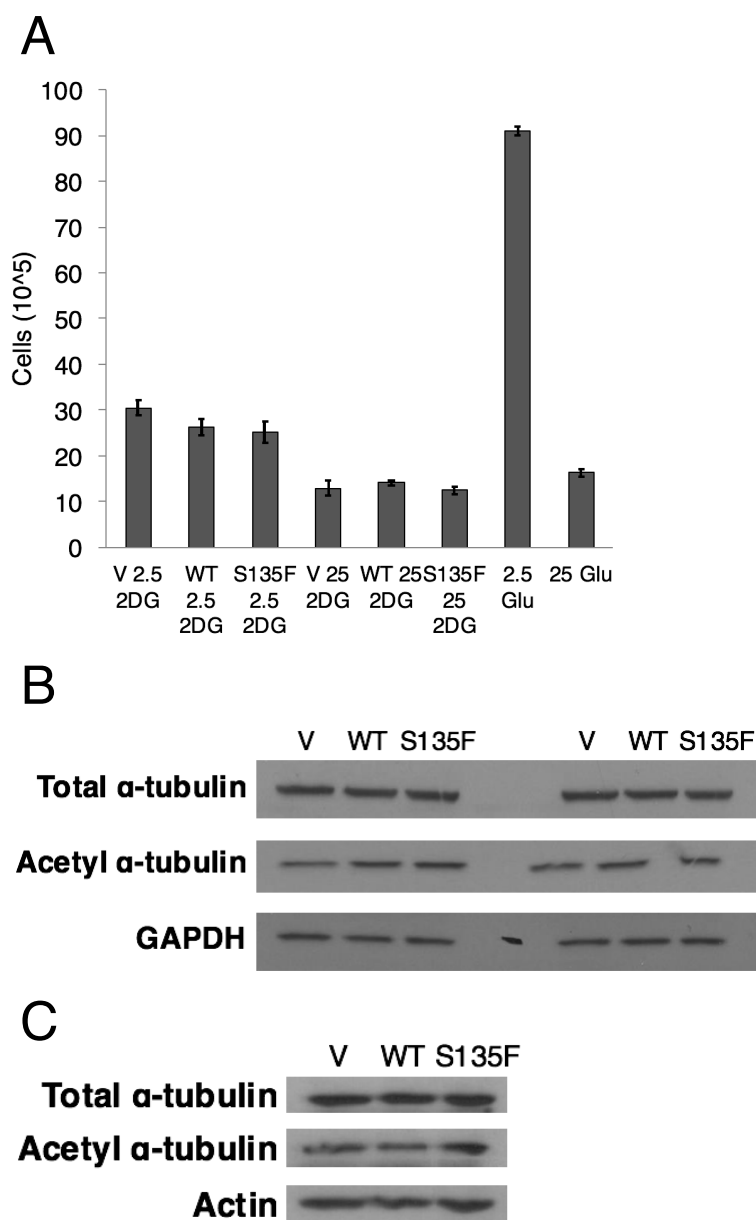

**Figure S8. Cellular viability and tubulin acetylation not changed by mutant Hsp27.** (A)

Trypan blue cell exclusion staining was used to count cells transiently transfected with Vector, WT Hsp27, or S135F for 48 hours and treated with either 2.5  $\mu$ M or 25  $\mu$ M 2-deoxyglucose (2-DG) or 2.5  $\mu$ M or 25  $\mu$ M glucose as a control. (B) S135F and P182L mutant Hsp27 do not alter  $\alpha$ -tubulin acetylation in stably transfected HT-22 cells. (C) S135F and P182L mutant Hsp27 do not alter  $\alpha$ -tubulin acetylation in transiently transfected HT-22 cells.
