# Supplementary material
Source: PubMed Central journal article supplement (PMC5892732)

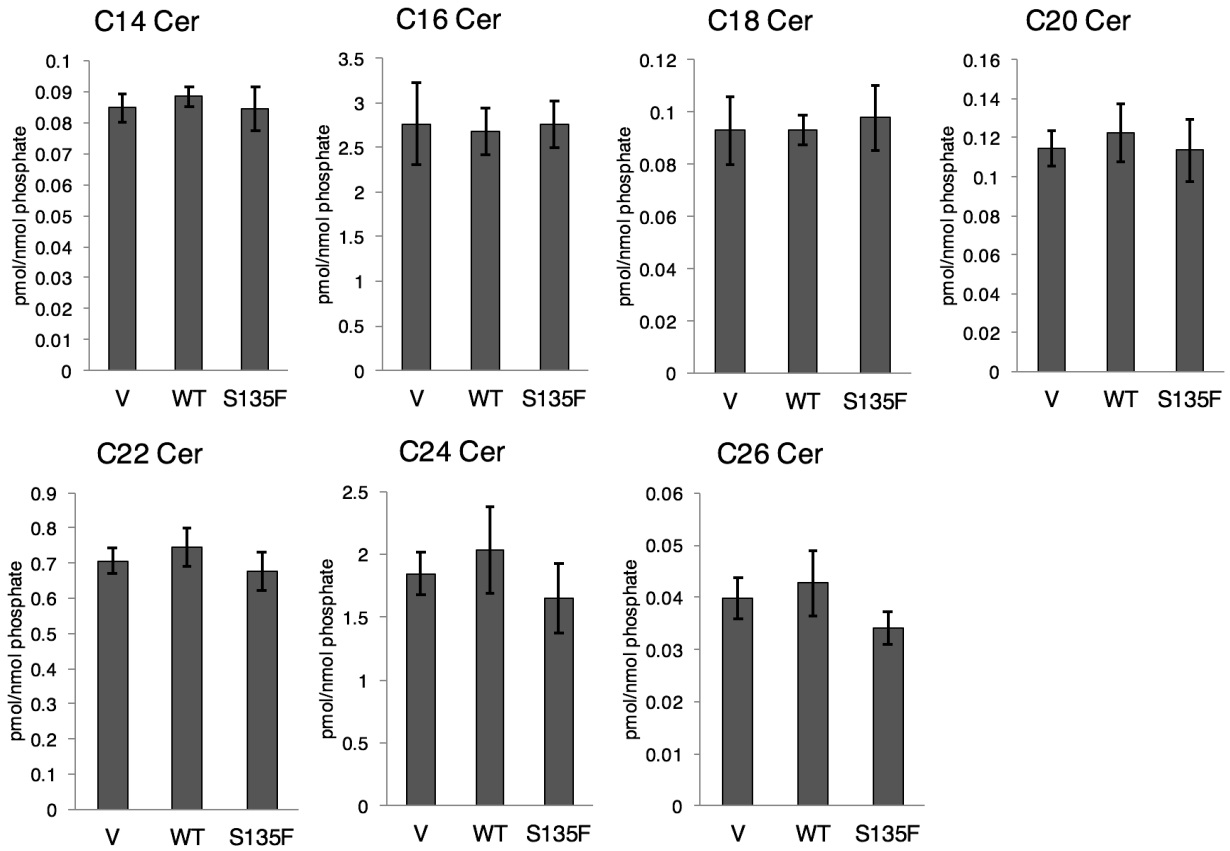

**Figure S3. S135F mutation does not cause altered ceramide levels in HT-22 cells (n=3).**

Supplement: fj.201701067R.sf3.pdf [file fj.201701067R.sf3.pdf]
